# Supplementary material for: Dust storms transport proteinaceous matter from the Gobi Desert to Northern China
Source: Copernicus journal article supplement (doi:10.5194/egusphere-2024-2065), 2024-08-23
Supplement: Supplementary file 1 [file egusphere-2024-2065-supplement.pdf]

# **Dust storms transport proteinaceous matter from the Gobi Desert to Northern China**

Ren-Guo Zhu<sup>1,2</sup>, Hua-Yun Xiao<sup>3,\*</sup>, Meiju Yin<sup>3</sup>, Hao Xiao<sup>3</sup>, Zhongkui Zhou<sup>1</sup>, Yuanyuan Pan<sup>1</sup>, Guo Wei<sup>1</sup>, Cheng Liu<sup>1</sup>

<sup>1</sup>School of Water Resources and Environmental Engineering, East China University of Technology, Nanchang 330013, China.

<sup>2</sup>Jiangxi Provincial Key Laboratory of Genesis and Remediation of Groundwater Pollution, East China University of Technology, Nanchang 330013, China.

<sup>3</sup>School of Agriculture and Biology, Shanghai Jiao Tong University, Shanghai 200240, China.

## **Contents of this file**

Table S1

Figure S1

## **Introduction**

The supporting information contains the supplementary Table S1 and Figure S1.

**Table S1. Particle Mass Concentrations and mean ratio of PM<sub>2.5</sub> to PM<sub>10</sub> at four sampling sites. Please note BJ represent Beijing, TJ represent Tianjin, SJZ represent Shijiazhuang, TY represent Taiyuan.**

| Sampling sites | PM <sub>10</sub> * |          | PM <sub>2.5</sub> * |          | PM <sub>2.5</sub> /PM <sub>10</sub> |          |
|----------------|--------------------|----------|---------------------|----------|-------------------------------------|----------|
|                | dust               | Non-dust | dust                | Non-dust | dust                                | Non-dust |
| <b>BJ</b>      | 1224**             | 141      | 147**               | 93       | 0.1                                 | 0.7      |
| <b>TJ</b>      | 849**              | 135      | 75                  | 77       | 0.1                                 | 0.6      |
| <b>SJZ</b>     | 761**              | 161      | 130**               | 63       | 0.2                                 | 0.4      |
| <b>TY</b>      | 611**              | 189      | 122**               | 64       | 0.2                                 | 0.4      |

\* Units are  $\mu\text{g m}^{-3}$  for particle mass.

\*\* $p < 0.01$

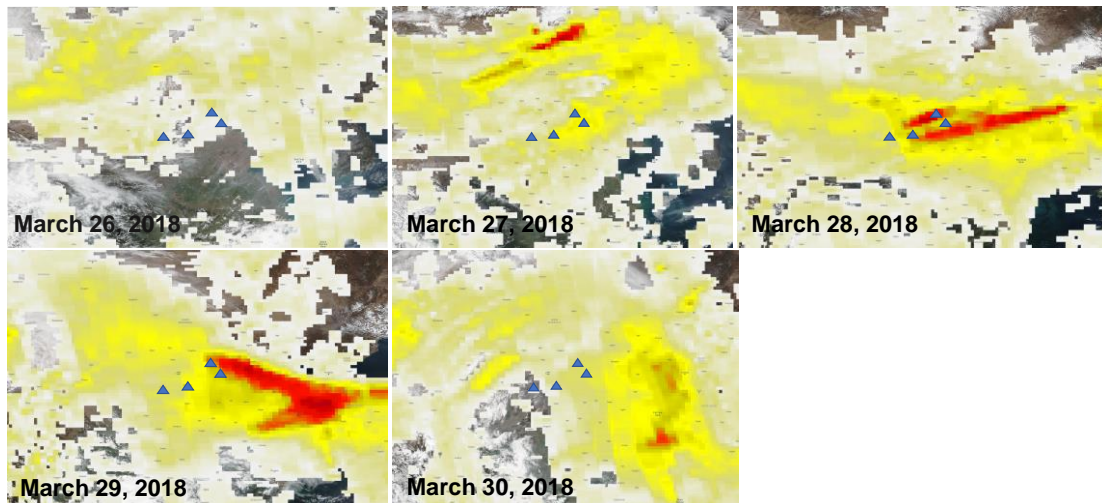

Figure S1. MODIS satellite image over North China Plain during the sampling period obtained from NASA (<https://worldview.earthdata.nasa.gov/>, last access on 20 May 2022).
